# Supplementary material for: Aptamer-Guided Gene Therapy for Cancer Disease
Source: Preprints.org preprint supplement (doi:10.20944/preprints202409.1836.v1), 2024-09-24
Supplement: Supplementary file 1 [file supplementary]

| Target        | Internalizing Aptamer | siRNA target      | Type of conjugate                              | Tumor models (cells)        | Reference |
|---------------|-----------------------|-------------------|------------------------------------------------|-----------------------------|-----------|
| PSMA          | A10                   | PLK1 – BCL2       | “Two-blocks”                                   | Prostate (LNCaP – 22Rv1)    | [68]      |
| PSMA          | A10-3.2               | PLK1              | “Two-blocks”                                   | Prostate (LNCaP – 22Rv1)    | [69]      |
| BAFF-R        | R-1                   | STAT-3            | “Two and Three blocks”                         | Lymphomas (Jeko-1 and Z138) | [70]      |
| EpCAM         | Anti-EpCAM aptamer    | Survivin          | “Two-blocks”                                   | Breast (MCF-7/Adr)          | [72]      |
| EpCAM         | Anti-EpCAM aptamer    | PLK1              | “Two-blocks”                                   | Breast (MDA-MB-468)         | [74]      |
| PDGFR $\beta$ | Gint4.T               | STAT-3            | “Three-blocks”                                 | Glioma (U87MG – T98G)       | [75]      |
| PDGFR $\beta$ | Gint4.T               | STAT-3            | “Three-blocks”                                 | Patient-derived GSC         | [76]      |
| PDGFR $\beta$ | Gint4.T               | STAT-3            | “Three-blocks”                                 | NSCLC (Calu-1)              | [77]      |
| PSMA          | A10-3.2               | Survivin and EGFR | Bivalent aptamer-based “three-blocks conjugate | Prostate (C4-2)             | [79]      |
| HER2          | Anti-HER2 aptamer     | EGFR              | Bivalent aptamer-based “three-blocks conjugate | Breast (BT474)              | [80]      |
| HER2 & HER3   | Anti-HER2 & Anti-HER3 | EGFR              | Bivalent aptamer-based “three-blocks conjugate | Breast (BT474)              | [81]      |

**Supplementary Table 2: Aptamer-based siRNA conjugates.** A summary of the aptamer-siRNA conjugates which are discussed in the review. The table includes information regarding the aptamer used, its recognized target, the siRNA conjugated to the aptamer, the type of conjugation according to the classification discussed, and the cellular models used for the validation.
