# Supplementary material for: Aptamer-Guided Gene Therapy for Cancer Disease
Source: Preprints.org preprint supplement (doi:10.20944/preprints202409.1836.v1), 2024-09-24
Supplement: Supplementary file 2 [file supplementary]

| Target                | Internalizing Aptamer | miRNA or antimiR mimics | Type of conjugate                            | Tumor models (cells)                                    | Reference |
|-----------------------|-----------------------|-------------------------|----------------------------------------------|---------------------------------------------------------|-----------|
| Axl                   | GL21.T                | Let-7g                  | “Two-blocks”                                 | NSCLC (A549)                                            | [46]      |
| Axl                   | GL21.T                | miR-212                 | “Two-blocks”                                 | NSCLC (A549)                                            | [49]      |
| Axl                   | GL21.T                | Let7g                   | “Three-blocks”                               | NSCLC (A549)                                            | [46]      |
| Axl                   | GL21.T                | miR-16                  | “Three-blocks”                               | NSCLC (A549)                                            | [46]      |
| Axl                   | GL21.T                | miR-34c                 | “Three-blocks”                               | NSCLC (Calu-1 A549)                                     | [51]      |
| Axl                   | GL21.T                | miR-137                 | “Three-blocks”                               | NSCLC (A549 and patient-derived)                        | [52]      |
| Axl                   | GL21.T                | miR148b                 | “Three-blocks”                               | BC (MDAMB231 and 4175-TGL) and melanoma (MA-2 and MC-1) | [53]      |
| KIT                   | Anti-KIT aptamer      | miR-26a                 | “Two-blocks”                                 | BC (MDA-MB-231)                                         | [55]      |
| Nucleolin             | AS1411                | Let-7d                  | “Two-blocks” (post-synthesis)                | Gastric (MKN-45)                                        | [56,57]   |
| Axl                   | GL21.T                | antimir-222 and miR-10b | “Two-blocks”                                 | GBM (U87MG)                                             | [59]      |
| Axl and PDGFR $\beta$ | GL21.T and Gint.4.T   | miR-137 and antimiR10b  | “Three-blocks”                               | GSC cells                                               | [60]      |
| EGFR                  | Anti-EGFR aptamer     | antimiR21               | three-way junction (3WJ)-based nanostructure | BC (MDA-MB-231)                                         | [62]      |

**Supplementary Table 1: Aptamer-based miRNA and antimiR conjugates.** A summary of the aptamer-miRNA and aptamer-antimiR conjugates which are detailed in the review. The table includes information regarding the aptamer used, its recognized target, the miRNA or antimiR mimic conjugated to the aptamer, the type of conjugation according to the classification discussed, and the cellular models used for the validation.
